# Supplementary material
Source: MDPI journal article supplement (https://www.mdpi.com/2073-4344/10/3/317)
Supplement: s1 [file s1]

## **Supplementary Materials**

### **Kinetic and Mechanistic Study of Rhodamine B Degradation by H<sub>2</sub>O<sub>2</sub> and Cu/Al<sub>2</sub>O<sub>3</sub>/g-C<sub>3</sub>N<sub>4</sub> Composite**

**Chunsun Zhou<sup>†</sup>, Zhongda Liu<sup>†</sup>, Lijuan Fang, Yulian Guo, Yanpeng Feng, Miao Yang\***

**School of Chemistry, Chemical Engineering and Life Sciences, Wuhan University of Technology, 122 Luoshi Road, 430070 Wuhan, China**

**\* Corresponding Author: yangmiao@whut.edu.cn (M.Y.)**

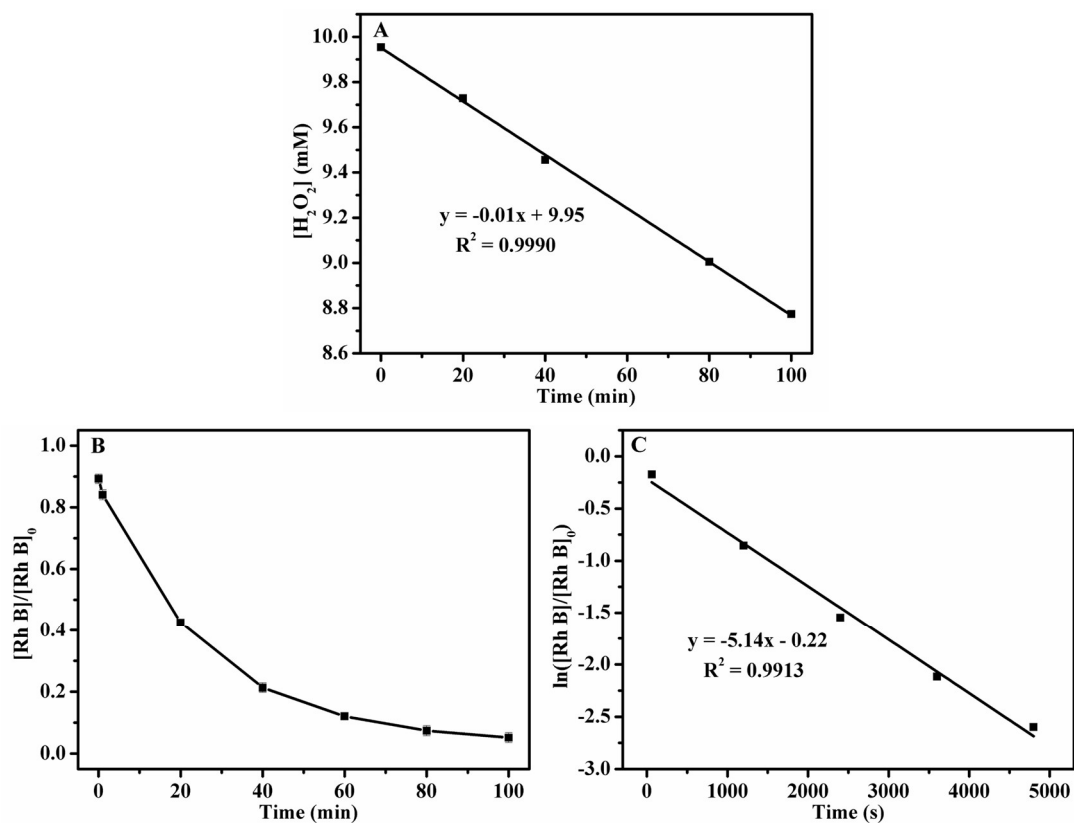

**Figure S1.** (A)  $[H_2O_2]$ , (B)  $[Rh B]/[Rh B]_0$ , and (C)  $\ln([Rh B]/[Rh B]_0)$  as a function of time in the presence of 1 g/L Cu/Al<sub>2</sub>O<sub>3</sub>/CN composite at room temperature. Reaction conditions:  $[Rh B]_0 = 20$  mg/L,  $[H_2O_2]_0 = 10$  mM,  $V = 100$  mL, pH 4.9 (unadjusted).

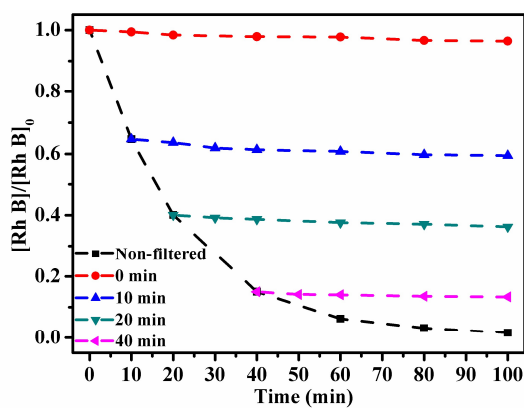

**Figure S2.**  $[Rh B]/[Rh B]_0$  as a function of time in nonfiltered Cu/Al<sub>2</sub>O<sub>3</sub>/CN suspension and filtrates obtained at selected time intervals. Reaction conditions: [catalyst] = 1g/L,  $[Rh B]_0 = 20$  mg/L,  $[H_2O_2]_0 = 10$  mM,  $V = 100$  mL, 25°C, pH 4.9 (unadjusted).

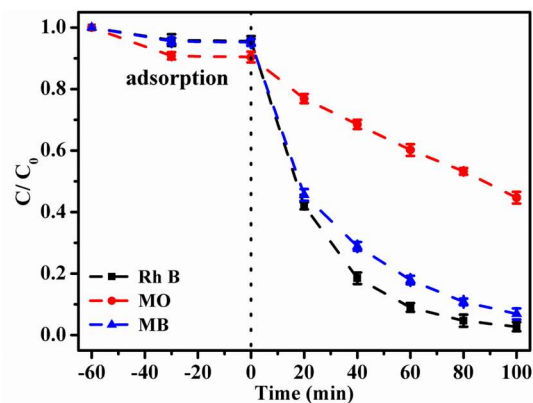

**Figure S3.**  $C/C_0$  as a function of time with different organic pollutants in the presence of 1 g/L Cu/Al<sub>2</sub>O<sub>3</sub>/CN composite. Reaction conditions: [dye] = 20 mg/L, [H<sub>2</sub>O<sub>2</sub>]<sub>0</sub> = 10 mM, V = 100 mL, 25°C, pH 4.9 (unadjusted).

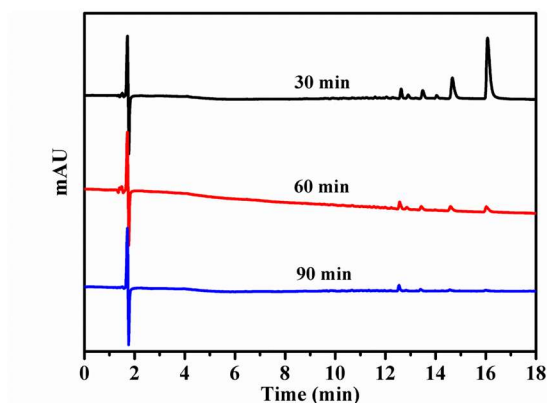

**Figure S4.** HPLC chromatograms of samples extracted at different reaction times in Rh B degradation. Reaction conditions: [catalyst] = 1 g/L, [dye] = 20 mg/L, [H<sub>2</sub>O<sub>2</sub>]<sub>0</sub> = 10 mM, V = 100 mL, 25°C, pH 4.9 (unadjusted).

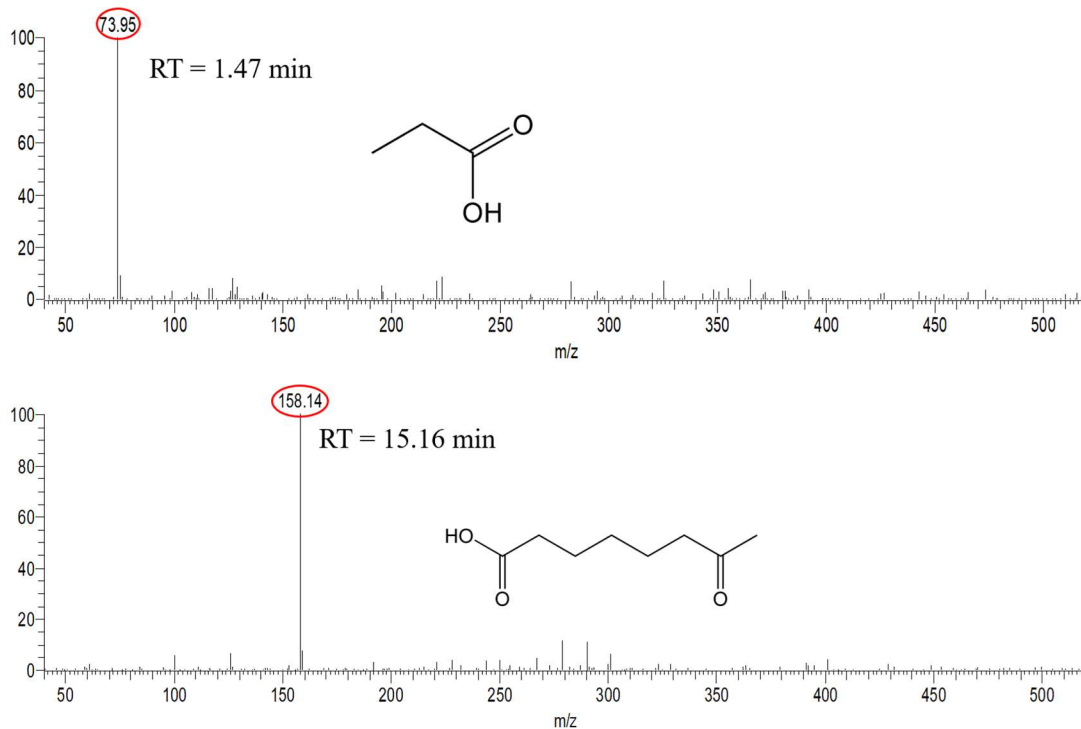

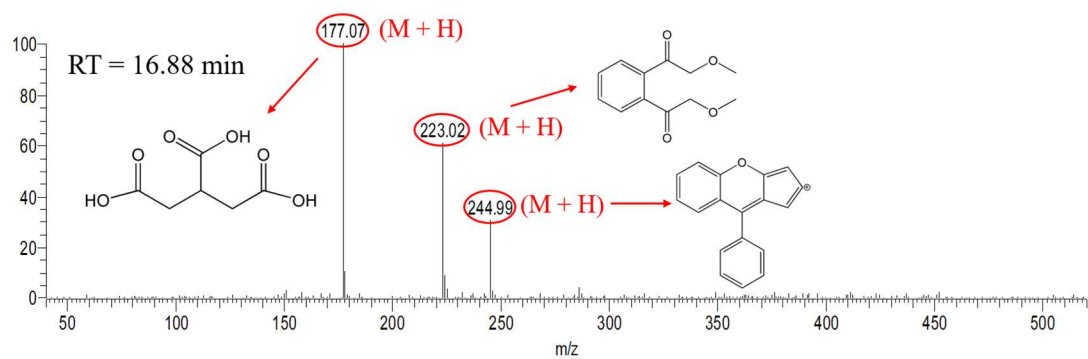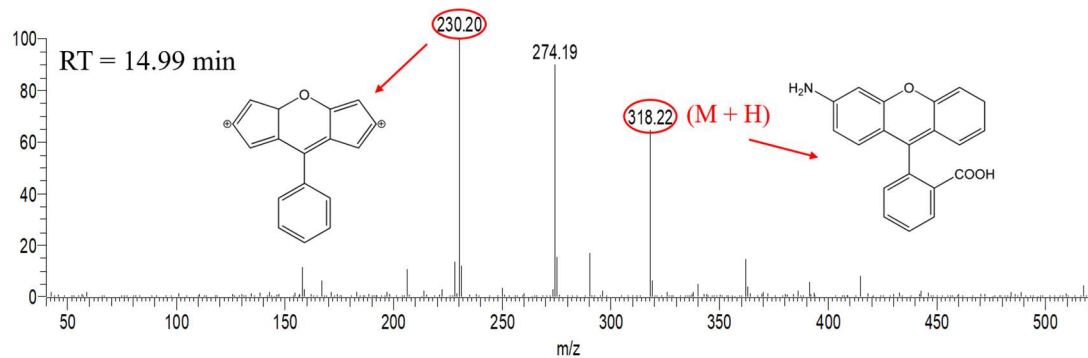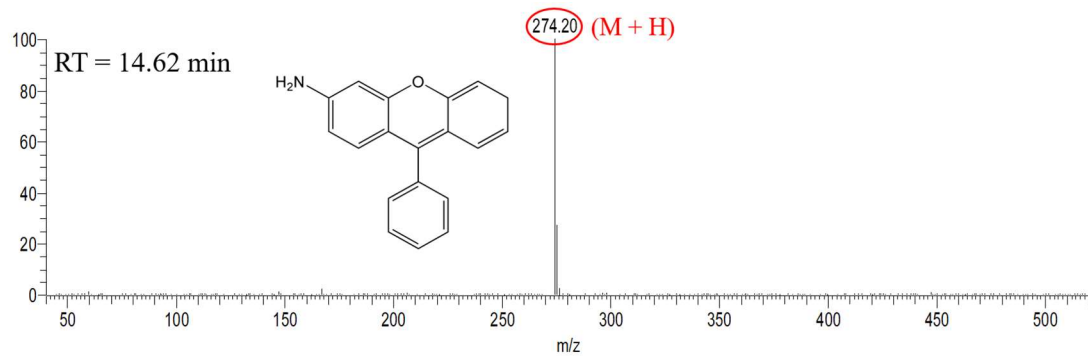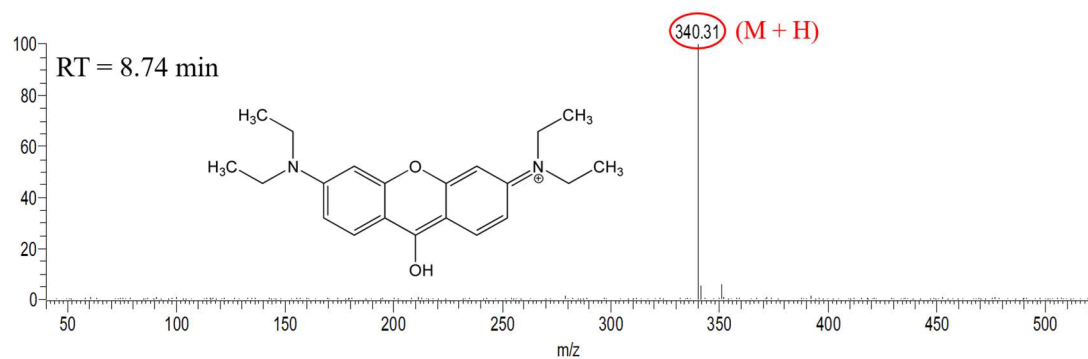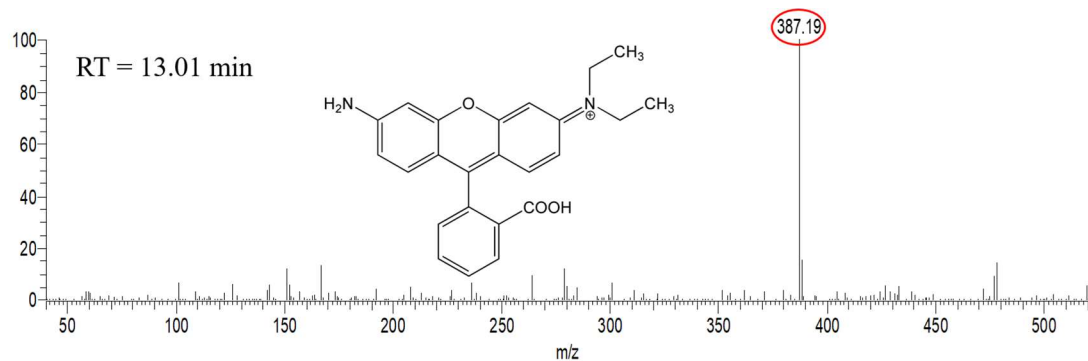

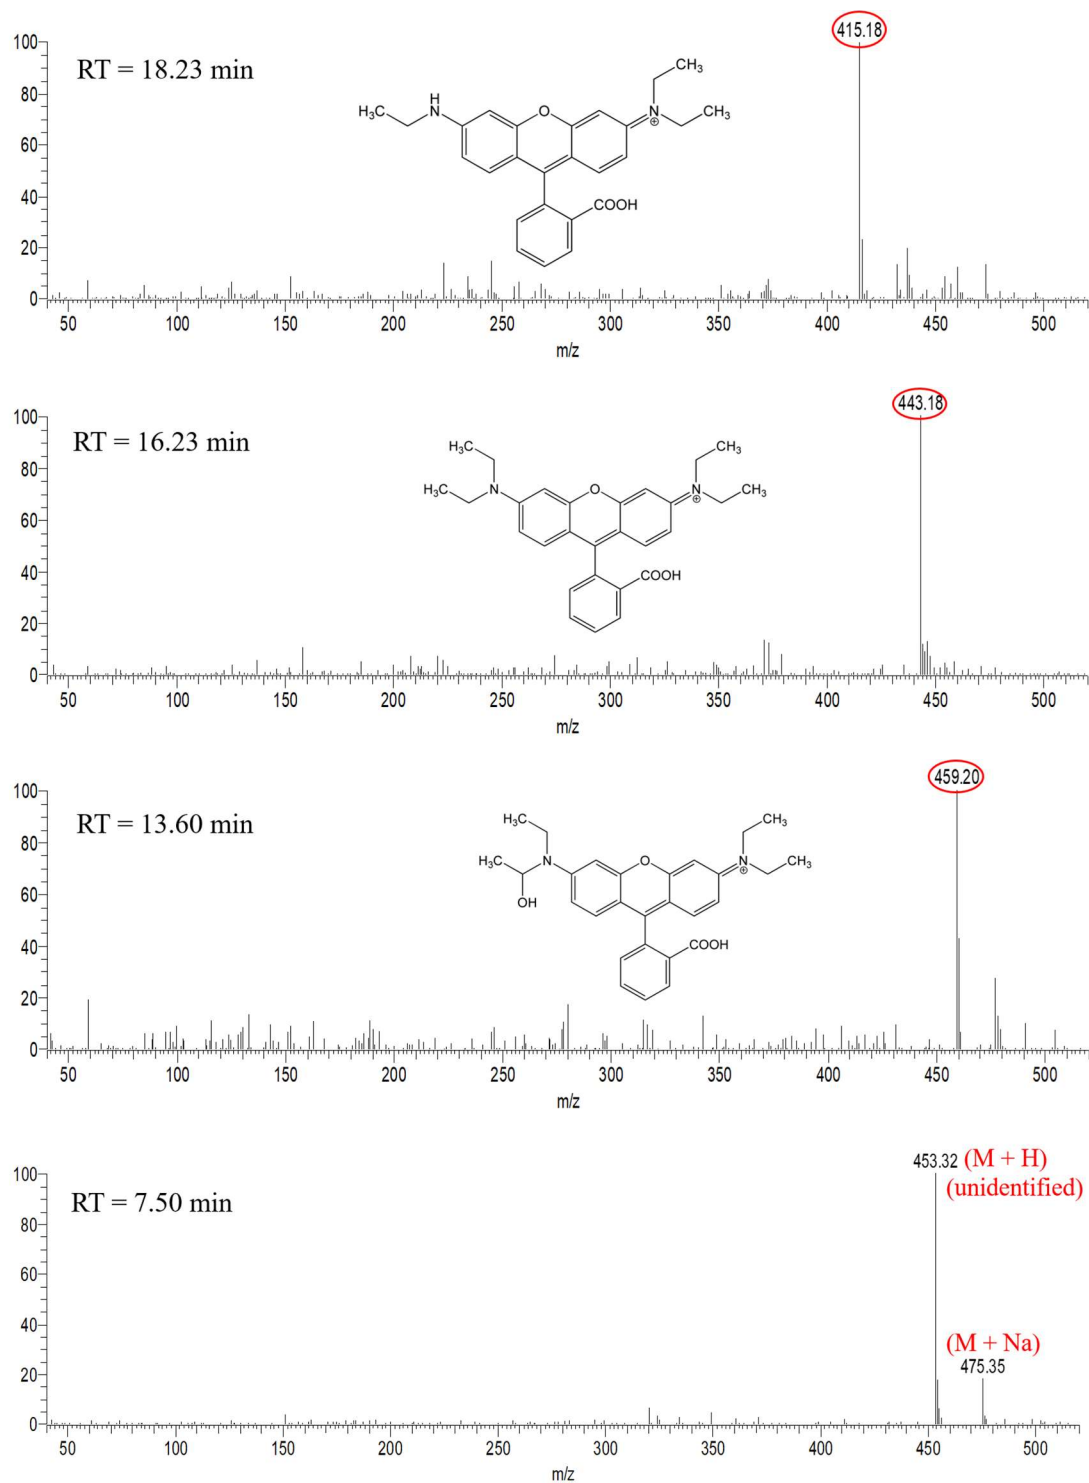

**Figure S5.** Mass spectra of the degradation products in the sample extracted at 60 min in Rh B degradation.

**Table S1.** Comparison of the catalytic activities of Cu/Al<sub>2</sub>O<sub>3</sub>/CN composite with other copper-based Fenton-like catalysts

| Catalyst                                                           | SSA<br>(m <sup>2</sup> /g) | [cata]<br>(g/L) | [Rh B]<br>(mg/L) | [H <sub>2</sub> O <sub>2</sub> ]<br>(mM) | pH         | T<br>(°C) | Time<br>(min) | Degradation<br>Ratio (%) | k <sub>obs</sub><br>(min <sup>-1</sup> ) | Cu<br>leaching<br>(ppm) | Ref          |
|--------------------------------------------------------------------|----------------------------|-----------------|------------------|------------------------------------------|------------|-----------|---------------|--------------------------|------------------------------------------|-------------------------|--------------|
| Cu/Al <sub>2</sub> O <sub>3</sub> /CN                              | 146.6                      | 1               | 20               | 10                                       | unadjusted | 25        | 100           | 96.4                     | 0.039                                    | 0.16                    | This<br>work |
| CuO (nanowires)                                                    | 14.29                      | 0.2             | 10               | 14.1                                     | unadjusted | 35        | 280           | 92                       | 0.0098                                   | N/A                     | [63]         |
| CuO (nanoparticles)                                                | 10.66                      | 0.2             | 10               | 14.1                                     | unadjusted | 35        | 280           | 61                       | 0.0036                                   | N/A                     | [63]         |
| CuO (nanorods)                                                     | 10.78                      | 0.2             | 10               | 14.1                                     | unadjusted | 35        | 280           | 86                       | 0.007                                    | N/A                     | [63]         |
| CuO (nanopetals)                                                   | 8.4                        | 0.2             | 200              | 1633                                     | unadjusted | 25        | 5             | 85                       | 0.006                                    | N/A                     | [64]         |
| CuO (nanoflowers)                                                  | 5.5                        | 0.2             | 200              | 1633                                     | unadjusted | 25        | 5             | 81                       | 0.0055                                   | N/A                     | [64]         |
| CuO (commercial)                                                   | 1.7                        | 0.2             | 200              | 1633                                     | unadjusted | 25        | 5             | 14                       | 0.0004                                   | N/A                     | [64]         |
| Fe-g-C <sub>3</sub> N <sub>4</sub> /GMC                            | 370.5                      | 0.8             | 50               | 40                                       | unadjusted | N/A       | 40            | 98                       | 0.1837                                   | 1.04                    | [69]         |
| 5Cu/Al <sub>2</sub> O <sub>3</sub> -750                            | 147.6                      | 1               | 10               | 1000                                     | 5.14       | 50        | 30            | 98.53                    | 0.14                                     | 0.45                    | [48]         |
| Cu@SiO <sub>2</sub> -R200                                          | N/A                        | 0.5             | 10               | 29.4                                     | neutral    | 60        | 10            | 95                       | 0.242                                    | 0.07                    | [73]         |
| Cu doped LaTiO <sub>3</sub>                                        | 8.5                        | 1.4             | 8                | 40                                       | 4          | N/A       | 120           | 94                       | N/A                                      | 1.4                     | [27]         |
| Cu-g-C <sub>3</sub> N <sub>4</sub>                                 | N/A                        | 0.2             | 10               | 300                                      | neutral    | N/A       | 15            | 92.3                     | N/A                                      | N/A                     | [70]         |
| Cu-Al <sub>2</sub> O <sub>3</sub> -g-C <sub>3</sub> N <sub>4</sub> | 284.1                      | 0.5             | 10               | 12.5                                     | neutral    | N/A       | 100           | 98                       | N/A                                      | 0.25                    | [40]         |
| Cu/g-C <sub>3</sub> N <sub>4</sub>                                 | 27.18                      | 0.8             | 50               | 40                                       | neutral    | 25        | 60            | 99.2                     | N/A                                      | 1.18                    | [71]         |
| Cu-Mn/CeO <sub>2</sub> /SBA-15                                     | 286                        | 0.2             | 2000             | 400                                      | 3          | 70        | 210           | 99                       | N/A                                      | N/A                     | [72]         |

SSA: specific surface area.

N/A: not available.
